# Supplementary material for: Mitochondria-specific photoactivation to monitor local sphingosine metabolism and function
Source: eLife journal article supplement (doi:10.7554/elife.34555), 2018-01-29
Supplement: supp [file elife-34555-supp-v1.zip]

Archive with 1 entries (1 files):
- elife_poa_e34555_Transparent_Reporting_File.pdf
